# Supplementary material for: Identification of acute kidney injury in African children with severe malaria: a multinational individual participant data meta-analysis
Source: Research Square preprint supplement (doi:10.21203/rs.3.rs-8106913/v1), 2025-11-23
Supplement: Supplementary file 1 [file 0449b98719553ff5beade6cc.docx]

Explanation of Ns for different analyses

| Data for analysis | N, participants | N, studies* | Where used in paper | Rationale |
| --- | --- | --- | --- | --- |
| Eligible | 13528 | 19 | 1st paragraph of Results  Fig 3  Table 3  Fig 4 | Supp Table S2  Supp Fig S5 | Include all for main AKI-mortality analysis, no heterogeneity but include sensitivity analyses to show robustness of findings |
| Eligible +  Low RoB | 5362 | 12 | AKI-mortality  Supp Fig S3 | Sensitivity analysis to supplement main AKI-mortality findings, consistent results when only include low RoB studies |
| Eligible – Excluding children with WHO-defined AKI, sensitivity | 13256 | 19 | AKI-mortality  Supp Fig S6 | Sensitivity analysis to show that even when excluding those with the most severe renal impairment (per WHO definition), KDIGO-defined AKI still associated with mortality |
| 2008 & onward | 7038 | 16 | Incidence of AKI  Fig 2  Supp Fig S1 | Remove studies conducted in earlier years (before 2008) due to differences in creatinine testing |
| 2008 & onward  Low RoB | 5362 | 12 | Incidence of AKI  Supp Fig S2 | Sensitivity analysis to supplement AKI incidence findings, consistent results when only including low RoB studies |
| Studies included in logistic regression sensitivity analysis | 12531 | 14 | Supp Fig S4a | Sensitivity analysis using logistic regression instead of Firth logistic regression, drops studies with sparse cells & separation |
| Studies included in logistic regression sensitivity analysis +  Low RoB | 4819 | 9 | Supp Fig S4b | Sensitivity analysis to above logistic regression, only including low RoB to show consistent findings |
| Hyperkalemia | 11002 | 10 | Supp Table S2  Fig 5a  Supp Fig S7a  Fig 6a | Includes all studies with potassium data available |
| Elevated BUN | 4319 | 12 | Supp Table S3  Fig 5b  Supp Fig S7b  Fig 6b | Includes all studies with BUN data available |

*Considers one study (Njuguna, Kenya 1993-2016 as two separate studies: 1993-2007 and 2008-2016)
Abbreviations: RoB, risk of bias; BUN, blood urea nitrogen
