# Supplementary material for: Identification of acute kidney injury in African children with severe malaria: a multinational individual participant data meta-analysis
Source: Research Square preprint supplement (doi:10.21203/rs.3.rs-8106913/v1), 2025-11-23
Supplement: Supplementary file 3 [file b47760ec742d051bd4d5ac3c.docx]

**Additional File 2.**

**Supplemental methods on cohorts included in the study**

**Uganda**

**Conroy, Uganda (2008-2013). IPDAKI-1CJ01.** Between 2008 and 2013, children microscopy-positive for malaria who met a clinical definition of cerebral malaria or severe malarial anemia were recruited at Mulago National Referral Hospital in Kampala, Uganda [1]. Children were eligible if they were between 18 months to 12 years of age. Cerebral malaria was defined as: 1) coma (Blantyre Coma Score ([BCS] ≤2); 2) Plasmodium falciparum on blood smear; and 3) no other known cause of coma (e.g., meningitis, a prolonged postictal state or hypoglycemia-associated coma reversed by glucose infusion). Severe malarial anemia was defined as the presence of *Plasmodium falciparum* on blood smear in children with a hemoglobin level < 5 g/dL. Children with CM or SMA were managed according to the Ugandan Ministry of Health treatment guidelines current at the time of the study. These included intravenous quinine treatment followed by oral quinine for severe malaria while admitted and artemisinin combination therapy for outpatient follow-up therapy. Exclusion criteria included prior coma, head trauma, hospitalization for malnutrition, cerebral palsy, or known chronic illness requiring medical care or causing developmental delay. At enrollment, all children had a physical examination and venous blood collected. Creatinine and blood urea nitrogen were tested on cryopreserved plasma samples using the modified Jaffe method (Indiana University Pathology Laboratory). Over the course of the study, the first line of antimalarial therapy changed from intravenous quinine to artesunate, and there was a gradual change in medication use, as previously described [2]. Neurologic deficits were assessed at discharge by standard neurological examination. Kidney replacement therapy was not available at the time of the study. Ethical approval was granted by the Institutional Review Boards for human studies at Makerere University School of Medicine and the University of Minnesota.

**Namazzi, Uganda (2014-2017). IPDAKI-1CJ02.** Between 2014 to 2018, children with a clinical diagnosis of severe malaria based on a positive blood smear or rapid diagnostic test were recruited at Mulago National Referral Hospital in Kampala, Uganda or Jinja Regional Referral Hospital in Jinja, Uganda [3]. Children were eligible if they were between 6 months to 4 years of age and met selected criteria for severe malaria (coma, respiratory distress, multiple seizures, severe anemia, prostration) and required hospitalization. Exclusion criteria included prior coma, head trauma, hospitalization for malnutrition, cerebral palsy, or known chronic illness requiring medical care or causing developmental delay. At enrollment, all children had a physical examination and venous blood collected. Lithium heparin whole blood was used for the i-STAT handheld blood analyzer to assess a basic metabolic panel, including creatinine, blood urea nitrogen, and potassium. The iSTAT creatinine assay is enzymatic. In addition, creatinine was tested on cryopreserved plasma samples using the modified Jaffe method (Indiana University Pathology Laboratory), which is IDMS traceable. Neurologic deficits were assessed at discharge by standard neurological examination. Kidney replacement therapy was not available at the time of the study. Ethical approval was granted by the Institutional Review Boards at Makerere University School of Medicine, the University of Minnesota, Indiana University, and regulatory approval was granted by the Uganda National Council for Science and Technology.

**Conroy, Uganda (2011-2013). IPDAKI-1KK01.** Between 2011 to 2013, children with severe malaria were enrolled in a randomized, double-blind, placebo-controlled trial evaluating inhaled nitric oxide (80 ppm) or room air as an adjunctive therapy for severe malaria [4]. Trial recruitment occurred at Jinja Regional Referral Hospital in Jinja, Uganda. Children were eligible if they were between 1 to 10 years of age and were positive for malaria by rapid diagnostic test using both HRP2 and pLDH and had at least one feature of severe malaria (repeated seizures, prostration, impaired consciousness, respiratory distress). Exclusion criteria included known chronic illness or severe malnutrition. At enrollment, all children had a physical examination and venous blood collected. Creatinine was tested using the i-STAT CHEM8+ cartridge alongside blood urea nitrogen and potassium (Abbott Laboratories, Saint-Laurent, Québec). The i-STAT creatinine assay is enzymatic and is traceable to isotype dilution mass spectrometry and free of interference from hemoglobin, bilirubin, and glucose. Neurologic deficits were assessed at discharge by standard neurological examination. Kidney replacement therapy was not available at the time of the study. The study was reviewed and approved by the Makerere University School of Medicine Research Ethics Committee (REC Protocol # 2010-107), the Uganda National Council on Science and Technology (Ref: HS 857), the National Drug Authority of Uganda (Ref: 297/ESR/ NDA/DID-01/2011), and the University Health Network Research Ethics Committee, Toronto, Canada (UHN REB Number 10-0607-B). The trial is registered (ClinicalTrials.gov Identifier: NCT01255215).

**Hawkes, Uganda (2012-2013). IPDAKI-1KK02.** Between 2012 and 2013, children aged 2 months to 5 years of age with a fever (axillary temperature >37.5°C) or history of fever and were sick enough to require hospitalization were enrolled at Jinja Regional Referral Hospital in Jinja, Uganda [5]. Children with fever and diarrhea, and no other signs were excluded. At enrollment, children were tested for malaria using a rapid diagnostic test, and children positive for malaria were included in this analysis. P. falciparum malaria. Venous blood was collected during initial stabilization, within minutes to hours of presentation to the hospital, and usually before administration of any therapeutics. Malaria diagnosis was based on both the detection of P. falciparum histidine-rich protein 2 (HRP2) and pan-malaria lactate dehydrogenase (pLDH) by a rapid diagnostic test (RDT) (First Response Malaria Ag. HRP2/pLDH Combo Rapid Diagnostic Test, Premier Medical Corporation Limited, India). Creatinine was measured on cryopreserved plasma using the modified Jaffe colorimetric method on an Alinity c instrument (Abbott, Lake Forest, IL, USA), which is traceable to an isotope dilution mass spectrometry (IDMS) reference method. Hospitalized patients were followed until death or discharge. Children who absconded from the study were excluded from this analysis as they did not have data on clinical outcomes. Kidney replacement therapy was not available at the time of the study. The study was approved by the Uganda National Council for Science and Technology, Makerere University Research Ethics Committee (Kampala, Uganda, REC Protocol # REF 2011-255), the University Health Network (Toronto, Canada, REB number 12-0039-AE), and was registered on clinicaltrials.gov (identifier: NCT04726826).

**Batte, Uganda (2023-2025). IPDAKI-1AC01**. Between 2023 and 2024, children 3 months to 16 years hospitalized with severe malaria (RDT or smear positive) were recruited at three referral hospitals in Uganda: Mulago National Referral and Teaching Hospital, Jinja Regional Referral Hospital, and Lira Regional Referral Hospital. Children were eligible if they required inpatient hospitalization and had a clinical diagnosis of severe malaria supported by a positive RDT or blood smear. Children were not eligible if they required maintenance dialysis, had congenital heart disease, and were enrolled in another study that would affect participation. At enrollment, children had a venous blood draw for a complete blood count and had serum chemistries conducted on-site using the Abaxis Piccolo Xpress system using the comprehensive metabolic panel of tests on lithium heparin whole blood, which included creatinine, blood urea nitrogen, and potassium. Creatinine was measured using an enzymatic assay that is IDMS traceable.

**Conradi, Uganda (2020-2021). IPDAKI-1MH01**. Between 2020 and 2021, children less than 5 years of age hospitalized with hypoxemia at 20 level IV health centers across Uganda were prospectively recruited into a pragmatic, country-wide, stepped-wedge, cluster randomized controlled trial where solar-powered oxygen systems were sequentially installed at 20 rural health facilities in Uganda [6]. Study inclusion criteria were cough or difficulty breathing, hypoxemia (O2 saturation <92%), and required hospitalization. Patients were excluded if they had known cyanotic congenital heart disease or hypoxemic ischemic encephalopathy. At enrollment, children had a physical examination and venous blood draw to test for malaria, and a subset of children had serum collected and stored at −20 °C before being transferred to Kampala for long-term storage at −80°C. The serum was Creatinine and blood urea nitrogen were tested at Mulago Hospital Chemistry lab using Cobas 6000 using the modified Jaffe method, which is isotype dilution mass spectrometry (IDMS) traceable. The study was reviewed and approved by the Makerere University School of Biomedical Sciences Research Ethics Committee (SBSREC-644) and the University of Alberta Health Research Ethics Board (Reference Pro00084784). The trial is registered (ClinicalTrials.gov Identifier: NCT03851783, registration date: 22 February 2019).

**Sserunkuuma, Uganda (2019-2023). IPDAKI-1JS01.** A hospital-based retrospective study of children with severe malaria was conducted on children admitted between 2020 and 2023 to St. Francis Hospital, Nsambya, in Kampala, Uganda. The hospital is a large private, not-for-profit facility ranked at the level of a Regional Referral Hospital. A retrospective chart review was conducted to obtain information from the physical examination and laboratory results from the hospital database. Thick blood smears were conducted to diagnose malaria using Field stain and evaluation by a single microscopist. Five millimeters of venous blood was collected for a complete blood count and serum chemistries. Creatinine was tested using a Cobas C311 machine using the modified Jaffe method, which is IDMS traceable. In patients who required dialysis, they received hemodialysis through central venous catheters. Severe malaria was managed with at least three doses of intravenous artesunate 12 hourly followed by oral artemether-lumefantrine. In some instances, patients were managed with both quinine and artesunate or switched to quinine when they had completed a full treatment course of artesunate before referral. Specific antimalarial treatment was not available at the individual patient level. The Research Ethics Committee of St. Francis Hospital Nsambya approved the study.

**Nakuya, Uganda (2021-2022). IPDAKI-1NM01.** Between January and July 2022, 255 participants aged 6 months to 12 years of age admitted to Soroti Regional Referral Hospital in Eastern Uganda with dark urine were recruited into a study to assess AKI prevalence. Children were eligible for enrollment if their parents reported dark urine within the past 7 days, corresponding to a color grade 5 or above on the Hammersmith urine color chart. At enrollment, children underwent a physical examination and had a venous blood draw to assess for malaria using rapid diagnostic test and blood smear analysis and to assess creatinine. Children negative for malaria were excluded from the analysis. Creatinine was assessed on a Cobas 311 analyzer using the modified Jaffe reaction, which is IDMS-traceable. Makerere University School of Medicine Research Ethics Committee (SOMREC) approved the study, and administrative clearance was obtained by Soroti Regional Referral Hospital. Written informed consent was obtained from caregivers of all children and assent was obtained for children ≥8 years.

**Imani, Uganda (2007-2010). IPDAKI-1PI01.** Between June 2007 and August 2010, a hospital-based prospective study of children 0 to 15 years of age was conducted at Mulago National Referral Hospital in Kampala, Uganda [7]. Inclusion criteria included an admission with one of three severe acute infections (gastroenteritis, malaria, pneumonia), and exclusion criteria included known kidney disease. On admission, all children had a physical examination and venous blood draw. Children were included in this analysis if they had confirmed malaria based on a rapid diagnostic test or blood smear. Creatinine was measured on serum using the Cobas Integra 400 machine using the modified Jaffe reaction. Kidney replacement therapy was not available at the time of the study. All parents or legal guardians provided written informed consent for participation. The study was approved by the Makerere University Research and Ethics Committee and the Seattle Children’s Institutional Review Board (FWA00002443).

**Kenya**

**Njuguna, Kenya (1993-2016). IPDAKI-2PB01.** Since 1989, a continuous surveillance of hospital admissions to Kilifi County Hospital was conducted in partnership with the KEMRI-Wellcome Trust Research Programme as described [8]. On admission, a physical examination is conducted with routine malaria blood slides conducted on all admissions. Extended biochemical screens were conducted for children with more severe illness. Between 1989 and 2010 severe malaria was managed with parenteral quinine followed by intravenous artesunate in 2010. Once children were able to tolerate oral medication, they received a full treatment course of oral antimalarial medication (chloroquine until 1998, sulfadoxine-pyrimethamine until 2003, amodiaquine until 2005, artemether-lumefantrine to date). Children hospitalized between 1992 and 2016 with a diagnosis of severe malaria were included in this meta-analysis. Until 2004, creatinine was measured using the kinetic principle by Ciba Corning analyzer. From 2005, this was changed to Jaffe's principle using Selectra E analyzers. The timing of when modified Jaffe assays were implemented and when these were IDMS traceable are unknown. Kidney replacement therapy was not available throughout the study. Ethical approval was granted by KEMRI SSC/ERC committees before 2010, then subsequently by KEMRI SERU. Written informed consent was obtained from guardians in the local language of their choice. Data were accessed through the Harvard Dataverse at https://doi.org/10.7910/DVN/2HCFW0 following approval by the Data Governance Committee.

**Tanzania**

**Anstey, Tanzania (1995-1996). IPDAKI-3NA01.** Between May 1994 to January 1995 children 6 months to 9 years of age with cerebral malaria were recruited from the pediatric ward at Muhimbili Medical Centre, a tertiary hospital in Dar es Salaam, Tanzania [9]. Children were eligible if they had cerebral malaria based on the presence of *P. falciparum* on blood smear and coma (BCS≤2) that persisted for more than 30 minutes after the last convulsion with no other cause of coma identified based on clinical or cerebrospinal fluid investigations. Retinopathy was not assessed. Cerebral malaria was managed with intravenous quinine, as recommended at that time. At enrollment, children had a complete physical examination and a venous blood draw using EDTA as an anticoagulant. Creatinine was measured on cryopreserved plasma at the Durham VA Hospital using an Ektachem autoanalyzer (Eastman Kodak, Rochester, NY) using the kinetic method. Kidney replacement therapy and ventilatory support were not available at the time of the study. All parents or legal guardians provided written informed consent. The study was approved by the College Research and Publications Committee and Muhimbili Medical Center and the Institutional Review Board at Duke University Medical Center.

**Mozambique**

**Varo, Mozambique (2016-2019). IPDAKI-5QB01.** Children (aged 1-12 years) enrolled in a prospective, parallel arm, equally randomized, placebo-controlled, double-blind trial of rosiglitazone vs placebo, in 180 Mozambican children with severe malaria. The trial was conducted by the *Centro de Investigação em Saúde de Manhiça* (CISM) at the Manhiça District Hospital (MDH), in southern Mozambique between 2016 and 2019. Children were randomized to receive either placebo (n = 89) or rosiglitazone (n = 91) at 0.045 mg/kg/dose twice daily for 4 days in addition to standard of care [10]. Children were eligible if they had: a positive rapid diagnostic test (histidine rich protein-II) and/or confirmation of parasitemia of at least >2500 parasites/µl on thick smears, as well as one or more selected features of SM: repeated seizures (two or more generalized seizures in 24 h), prostration, impaired consciousness (Blantyre Coma Score <5 or Glasgow Coma Score <15), respiratory distress (sustained nasal flaring, deep breathing or sub-costal retractions), severe anemia (hemoglobin ≤5 g/dl), hypoglycemia (glucose <2.5 mmol/l) or hyperlactatemia (lactate >5 mmol/l); as well as requiring hospitalization and parenteral artesunate for their malaria infection based on admitting clinician assessment. Those presenting with severe malaria anemia alone, were excluded from the study. Potential participants with known underlying illness (neurological or neurodegenerative disorders; cardiac, renal, or hepatic disease; diabetes; epilepsy; cerebral palsy; or children known to be HIV-1 positive); receiving antiretroviral treatment or treatment with a thiazolidine; or unable to remain in research site region for the follow up period were also excluded from the study. At enrollment, all children had a physical examination and a blood draw taken. A blood sample was taken at baseline and prior to the administration of the study intervention, for malaria diagnosis by microscopy, and hematological (hemoglobin, hematocrit, platelets, and white cell full blood count) and biochemical (renal and liver function, glucose, and lactate) evaluations. Creatinine was measured using the modified Jaffe method. All children received the Mozambican standard of care for SM of parenteral artesunate at 2.4 mg/kg/dose on admission, 12 hours (h) and 24 h after, and then once a day for at least 24 h; followed by a full course of oral artemisinin-based combination treatment (CoartemⓇ Dispersible; artemether–lumefantrine 20 mg/120 mg, Novartis) with dosage determined by body weight, twice daily as recommended by national guidelines. Kidney replacement therapy was not available at the time of the study. Clinical outcomes included in-hospital mortality and the presence of neurologic deficits at discharge. All participants and their parents/legal guardians were given detailed oral and written information about the trial, and children were recruited only after a written informed consent was signed by their parents/legal guardians. Verbal assent was obtained from children over the age of 8. This study was approved by the Mozambican National Bioethics Committee (CNBS) (Ref.230/CNBS/15); the pharmaceutical department of the Mozambican Ministry of Health (Ref. 374/380/DF2016); the Clinical Research Ethics Committee of the Hospital Clínic, Barcelona, Spain (Ref. HCB/2015/0981); and the University Health Network Research Ethics Committee, Toronto, Canada (UHN REB Number 15-9013-AE). The trial was registered with ClinicalTrials.gov on December 09, 2015, (NCT02694874).

**Bassat, Mozambique (2006). IPDAKI-5QB02.** This was a prospective study enrolling children with severe malaria ≤10 years of age presenting at the Manhiça District Hospital (MDH) in 2006. Children with severe malaria had a clinical diagnosis of malaria based on the presence of asexual P. falciparum parasitemia on Giemsa-stained blood smears, with at least one of the following severity criteria: cerebral malaria, severe malarial anemia (packed cell volume ≤15% or hemoglobin ≤5 g/dL), acute respiratory distress (chest indrawing and/or deep breathing), hyperlactatemia (lactate ≥ 5 mmol/L), prostration (inability to sit or breastfeed in children old enough to do so), hypoglycemia (blood glucose ≤2.2 mmol/L) and multiple seizures (≥ 2 convulsions in the preceding 24 h). On enrollment children had a complete physical examination and venous blood draw. Hematological and biochemical parameters were performed for each patient using Vitros DT60 and Sysmex Kx21 analyzers. Creatinine was tested using the modified Jaffe method but predated the availability of IDMS traceable assays. Patients were treated following the Mozambican national guidelines for malaria management at the time, including intravenous quinine. Kidney replacement therapy was not available at the time of the study. Written informed consent was provided by all parents or legal guardians. This study was reviewed and approved by the Mozambican National Bioethics Committee and the Clinical Research Ethics Committee of the Hospital Clínic, Barcelona, Spain.

**Nigeria**

**Afolayan, Nigeria (2016-2017). IPDAKI-6AF01.** Children with clinical and laboratory features of severe malaria between 6 months and 14 years of age were prospectively recruited between 2016 to 2017 at the University of Ilorin Teaching Hospital in Kwara State, Nigeria [11]. A total of 170 children were enrolled in the study. Children with chronic illnesses including HIV infection, chronic kidney disease, sickle cell disease and diabetes mellitus were excluded from the study, as well as children with severe malnutrition or children taking steroids. Malaria was assessed using a RDT for HRP-2 or by Giemsa-stained peripheral blood smears. Children were treated with intravenous artesunate as the first line therapy for severe malaria followed by Creatinine was assessed using the modified Jaffe reaction using alkaline picric acid. Ethical approval for this study was obtained from the Human Ethical Review Committee of the University of Ilorin Teaching Hospital (ERC PAN/2016/04/1523).

**Ibrahim, Nigeria (2019-2020). IPDAKI-6IO01.** A retrospective review of malaria cases at the Federal Teaching Hospital in Katsina State, Nigeria, was included in a study evaluating acute kidney injury in malaria[12]. Children three months to 14 years of age with a parasitological confirmation of malaria (positive RDT or blood smear) were considered eligible for the study. Exclusion criteria included children with underlying chronic kidney disease based on clinical history and findings on admission, chronic illnesses including malignancies or chronic liver disease. Children were managed for severe malaria according to National guidelines including a minimum of three doses of intravenous artesunate. Information on patient sociodemographic, clinical history, physical findings, and laboratory parameters at presentation from the electronic health record. Institutional Ethical Review Committee approved this study, FMCNHREC.REG.N003/0830425. AKI was managed conservatively, and dialysis was provided where clinically indicated and available.

**Oluwadare, Nigeria (2022). IPDAKI-6OL01.** A cross-sectional study of children aged 6 months to 15 years of age hospitalized with features of severe malaria were prospectively recruited in 2022 at the University College Hospital in Ibadan, Nigeria[13]. The hospital is a referral hospital in Oyo State in Southwestern Nigeria and has the capacity to provide intensive care and dialysis. Children were eligible if they presented with WHO features of severe malaria. Children were excluded if they did not reside within the catchment area, were on chronic transfusion therapy or who died shortly after admission before data collection was completed. Blood samples were collected for malaria microscopy, rapid diagnostic test, a complete blood count, and serum chemistries. The study protocol was approved by the University of Ibadan (UI)/ University College Hospital (UCH) Joint Ethics Review Committee.

**Malawi, Zambia, Democratic Republic of the Congo**

**Wynkoop, multi-country (2023). IPDAKI-7HW01.** Starting in October 2023, children aged 6 months to 11 years of age meeting WHO criteria for cerebral malaria (CM) and/or severe malarial anemia (SMA) were recruited across four sites: Kalembe Lembe Children’s Hospital in Kinshasa, Democratic Republic of Congo (DRC), Lodja District Referral Hospital in Lodja, DRC, Queen Elizabeth Central Hospital in Blantyre, Malawi, and Chipata Central Hospital in Chipata, Zambia. Malaria infection was diagnosed by peripheral blood smear in DRC and Malawi and by rapid diagnostic test in Zambia. Exclusion criteria include children < 6 months or ≥12 years of age and children with one or more of the following: severe neurologic disabilities such as cerebral palsy putting them at risk for aspiration, congenital heart disease, chronic renal failure, sickle cell disease, malignancy, known immunocompromising conditions such as HIV, severe acute malnutrition, suspected TB or treated for TB within the last 1 year, and children currently on continuous positive airway pressure or mechanical ventilation. CM and SMA patients admitted to the hospital who meet inclusion criteria were identified and consented by study staff. On admission, point-of-care labs including hemoglobin, lactate, glucose, blood gas analysis, electrolytes, BUN and creatinine were obtained using a Hemocue and two iSTAT cartridges (CG4+ and Chem8+). The i-STAT creatinine assay is enzymatic and is traceable to isotype dilution mass spectrometry and free of interference from hemoglobin, bilirubin, and glucose. Severe malaria was managed using intravenous artesunate for a minimum of three doses followed by a complete oral course of antimalarial therapy. Peritoneal dialysis is available in Blantyre and hemodialysis is available in a limited capacity for older children in Chipata, but no enrolled subject received these therapies. Patient outcome was recorded at the time of discharge. All parents or legal guardians provided written informed consent. Ethical approval was obtained through Nationwide Children’s Hospital (STUDY00003593) and at each location according to local protocol. In DRC, Comité National d'Éthique de la Sante (499/CNES/BN/PMMF/2023) provided approval for the Kinshasa and Lodja sites. In Malawi, the College of Medicine Research and Ethics Committee at the Kamuzu University of Health Sciences (P.07/23-0169) provided approval for Blantyre. The National Health Research Authority (NHRAR-R-1165/14/12/2023) and University of Zambia Biomedical Research Ethics Committee (4913-2024) both provided approval for Chipata.

**References**

1. Conroy AL, Opoka RO, Bangirana P, et al. Acute kidney injury is associated with impaired cognition and chronic kidney disease in a prospective cohort of children with severe malaria. BMC Med **2019**; 17:98.

2. Conroy AL, Opoka RO, Bangirana P, et al. Parenteral artemisinins are associated with reduced mortality and neurologic deficits and improved long-term behavioral outcomes in children with severe malaria. BMC Med **2021**; 19:168.

3. Namazzi R, Opoka R, Datta D, et al. Acute Kidney Injury Interacts With Coma, Acidosis, and Impaired Perfusion to Significantly Increase Risk of Death in Children With Severe Malaria. Clin Infect Dis **2022**; 75:1511-9.

4. Hawkes MT, Conroy AL, Opoka RO, et al. Inhaled nitric oxide as adjunctive therapy for severe malaria: a randomized controlled trial. Malaria journal **2015**; 14:421.

5. Leligdowicz A, Conroy AL, Hawkes M, et al. Risk-stratification of febrile African children at risk of sepsis using sTREM-1 as basis for a rapid triage test. Nat Commun **2021**; 12:6832.

6. Conradi N, Opoka RO, Mian Q, et al. Solar-powered O(2) delivery for the treatment of children with hypoxaemia in Uganda: a stepped-wedge, cluster randomised controlled trial. Lancet **2024**; 403:756-65.

7. Imani PD, Odiit A, Hingorani SR, Weiss NS, Eddy AA. Acute kidney injury and its association with in-hospital mortality among children with acute infections. Pediatr Nephrol **2013**; 28:2199-206.

8. Njuguna P, Maitland K, Nyaguara A, et al. Observational study: 27 years of severe malaria surveillance in Kilifi, Kenya. BMC Med **2019**; 17:124.

9. Anstey NM, Hassanali MY, Mlalasi J, Manyenga D, Mwaikambo ED. Elevated levels of methaemoglobin in Tanzanian children with severe and uncomplicated malaria. Trans R Soc Trop Med Hyg **1996**; 90:147-51.

10. Varo R, Crowley VM, Mucasse H, et al. Adjunctive rosiglitazone treatment for severe paediatric malaria: a randomized placebo-controlled trial in Mozambican children. Int J Infect Dis **2023**.

11. Afolayan FM, Adedoyin OT, Abdulkadir MB, et al. Acute Kidney Injuries in Children with Severe Malaria: A comparative study of diagnostic criteria based on serum cystatin C and creatinine levels. Sultan Qaboos Univ Med J **2020**; 20:e312-e7.

12. Ibrahim OR, Afolayan FM, Alao MA, Mohammed B, Suleiman BM, Adedoyin OT. Impact of methods of estimating baseline Serum Creatinine (bSCr) on the incidence and outcomes of acute kidney injury in childhood severe malaria. Egyptian Pediatric Association Gazette **2023**; 71:36.

13. Oluwadare LP, Oladokun RE, Ogunbosi BO, Labaeka AA, Taiwo OJ. Clinical Epidemiology and Geospatial Distribution of Cases of Severe Malaria in Children at a Tertiary Care Health Facility in Southwest Nigeria. International Journal of Medicine and Health Development **2025**; 30:133-45.
